# Supplementary material for: Physician Rating Websites: What Aspects Are Important to Identify a Good Doctor, and Are Patients Capable of Assessing Them? A Mixed-Methods Approach Including Physicians’ and Health Care Consumers’ Perspectives
Source: PubMed Central journal article supplement (PMC5432667; doi:10.2196/jmir.6875), 2017-05-01
Supplement: jmir_v19i5e127_app1.pdf [file jmir_v19i5e127_app1.pdf]

Appendix 1: Indicator comparison in terms of importance of the indicators as assessed by health care consumers and physicians.

| Dimension        | Indicator                                                                                                                | Health care consumers  |                               |                    |                |                            | Physicians             |                               |                    |      |                            |
|------------------|--------------------------------------------------------------------------------------------------------------------------|------------------------|-------------------------------|--------------------|----------------|----------------------------|------------------------|-------------------------------|--------------------|------|----------------------------|
|                  |                                                                                                                          | Not important<br>n (%) | Neutral or undecided<br>n (%) | Important<br>n (%) | Mean<br>(SD)   | Cate-<br>gory <sup>a</sup> | Not important<br>n (%) | Neutral or undecided<br>n (%) | Important<br>n (%) | Mode | Cate-<br>gory <sup>a</sup> |
| 1 Infrastructure | 1.1 The physician's practice is easily accessible and reachable by public transport and car                              | 47<br>(22.3)           | 32<br>(15.2)                  | 132<br>(62.5)      | 3.53<br>(1.24) | 2                          | 3<br>(15.8)            | 1<br>(5.3)                    | 15<br>(78.9)       | 5    | 1                          |
|                  | 1.2 The physician has necessary instruments to make the diagnosis in the practice                                        | 9<br>(4.3)             | 43<br>(20.4)                  | 159<br>(75.4)      | 4.00<br>(.83)  | 1                          | 3<br>(15.8)            | 3<br>(15.8)                   | 13<br>(68.4)       | 4    | 1                          |
|                  | 1.3 The patient's privacy is guaranteed                                                                                  | 5<br>(2.4)             | 26<br>(12.3)                  | 180<br>(85.5)      | 4.5<br>(.80)   | 1                          | 0                      | 0                             | 19<br>(100)        | 5    | 1                          |
|                  | 1.4 The practice is clean and hygienic                                                                                   | 0                      | 8<br>(3.8)                    | 203<br>(96.2)      | 4.76<br>(.51)  | 1                          | 0                      | 0                             | 19<br>(100)        | 5    | 1                          |
| 2 Staff          | 2.1 An appropriate number of expert staff is present in the practice (to welcome patients, assist with treatments, etc.) | 25<br>(11.8)           | 57<br>(27)                    | 129<br>(61.1)      | 3.6<br>(.95)   | 1                          | 0                      | 2<br>(10.5)                   | 17<br>(89.5)       | 4    | 1                          |
|                  | 2.2 The medical practice assistants are helpful and friendly                                                             | 7<br>(3.3)             | 17<br>(8.1)                   | 187<br>(88.6)      | 4.36<br>(.80)  | 1                          | 0                      | 2<br>(10.5)                   | 17<br>(89.5)       | 5    | 1                          |

|                |                                                                                          |              |              |               |                |   |              |              |              |   |   |
|----------------|------------------------------------------------------------------------------------------|--------------|--------------|---------------|----------------|---|--------------|--------------|--------------|---|---|
|                | 2.3 The medical practice assistants are experienced in their work                        | 41<br>(19.4) | 63<br>(29.9) | 107<br>(50.7) | 3.39<br>(1.02) | 2 | 5<br>(26.3)  | 4<br>(21.1)  | 10<br>(52.6) | 4 | 1 |
|                | 2.4 The physician has a lot of work experience and practices already for a longer time   | 18<br>(8.5)  | 58<br>(27.5) | 135<br>(64)   | 3.73<br>(.88)  | 1 | 0            | 1<br>(5.3)   | 18<br>(94.7) | 4 | 1 |
|                | 2.5 The physician collaborates well with his team                                        | 3<br>(1.4)   | 19<br>(9)    | 189<br>(89.6) | 4.33<br>(.72)  | 1 | 0            | 1<br>(5.3)   | 18<br>(94.7) | 5 | 1 |
|                | 2.6 The physician has completed a good education                                         | 11<br>(5.2)  | 56<br>(26.5) | 144<br>(68.2) | 3.91<br>(.89)  | 1 | 0            | 1<br>(5.3)   | 18<br>(94.7) | 5 | 1 |
| 3 Organization | 3.1 The waiting time until the next available appointment is short                       | 11<br>(5.2)  | 41<br>(19.4) | 159<br>(75.4) | 3.85<br>(1.10) | 1 | 4<br>(21.05) | 4<br>(21.05) | 11<br>(57.9) | 5 | 1 |
|                | 3.2 The patients are notified in case of appointment delays or cancellations             | 27<br>(12.8) | 44<br>(20.9) | 140<br>(66.4) | 4.12<br>(.87)  | 1 | 5<br>(26.3)  | 1<br>(5.3)   | 13<br>(68.4) | 5 | 1 |
|                | 3.3 It is easy to schedule an appointment with the physician                             | 1<br>(0.5)   | 13<br>(6.2)  | 197<br>(93.4) | 4.00<br>(.97)  | 1 | 0            | 1<br>(5.3)   | 18<br>(94.7) | 5 | 1 |
|                | 3.4 The physician is available for phone consultations (before or after the appointment) | 15<br>(7.1)  | 39<br>(18.5) | 157<br>(74.4) | 4.03<br>(.92)  | 1 | 3<br>(15.8)  | 1<br>(5.3)   | 15<br>(78.9) | 5 | 1 |

|                    |                                                                                                                                         |            |             |               |               |   |   |             |              |   |   |
|--------------------|-----------------------------------------------------------------------------------------------------------------------------------------|------------|-------------|---------------|---------------|---|---|-------------|--------------|---|---|
| 4 Technical skills | 4.1 The patient is diagnosed correctly                                                                                                  | 0          | 4<br>(1.9)  | 207<br>(98.1) | 4.82<br>(.45) | 1 | 0 | 1<br>(5.3)  | 18<br>(94.7) | 5 | 1 |
|                    | 4.2 The physician asks the relevant questions and orders the correct tests to reach the correct diagnosis                               | 1<br>(0.5) | 6<br>(2.8)  | 204<br>(96.5) | 4.74<br>(.52) | 1 | 0 | 0           | 19<br>(100)  | 5 | 1 |
|                    | 4.3 The physician proceeds systematically and competently to reach the correct diagnosis                                                | 0          | 8<br>(3.8)  | 203<br>(96.2) | 4.69<br>(.53) | 1 | 0 | 0           | 19<br>(100)  | 5 | 1 |
|                    | 4.4 The physician presents an appropriate and complete number of treatment options to the patient                                       | 2<br>(0.9) | 15<br>(7.1) | 194<br>(91.9) | 4.55<br>(.69) | 1 | 0 | 3<br>(15.8) | 16<br>(84.2) | 5 | 1 |
|                    | 4.5 The physician assesses the patient's handicaps correctly and presents him or her with appropriate information and treatment options | 2<br>(0.9) | 16<br>(7.6) | 193<br>(91.5) | 4.52<br>(.67) | 1 | 0 | 0           | 19<br>(100)  | 5 | 1 |
|                    | 4.6 The physician and his team execute the treatment steps correctly                                                                    | 0          | 9<br>(4.3)  | 202<br>(95.7) | 4.73<br>(.53) | 1 | 0 | 0           | 19<br>(100)  | 5 | 1 |
|                    | 4.7 The physician and his team adhere to hygiene guidelines                                                                             | 1<br>(0.5) | 5<br>(2.4)  | 205<br>(97.2) | 4.79<br>(.49) | 1 | 0 | 2<br>(10.5) | 17<br>(89.5) | 5 | 1 |
|                    | 4.8 The physician executes the treatment competently                                                                                    | 1<br>(0.5) | 3<br>(1.4)  | 207<br>(98.1) | 4.75<br>(.49) | 1 | 0 | 0           | 19<br>(100)  | 5 | 1 |

|                        |                                                                                                           |            |              |               |               |   |   |   |             |   |   |
|------------------------|-----------------------------------------------------------------------------------------------------------|------------|--------------|---------------|---------------|---|---|---|-------------|---|---|
|                        | 4.9 The physician makes the correct diagnosis timely and initiates the treatment swiftly                  | 1<br>(0.5) | 5<br>(1.9)   | 202<br>(95.7) | 4.82<br>(.46) | 1 | 0 | 0 | 19<br>(100) | 5 | 1 |
| 5 Interpersonal skills | 5.1 The patient can freely express his symptoms (comfortable conversation climate)                        | 3<br>(1.4) | 6<br>(2.8)   | 202<br>(95.7) | 4.68<br>(.62) | 1 | 0 | 0 | 19<br>(100) | 4 | 1 |
|                        | 5.2 The physician involves the patient adequately into the treatment decision                             | 1<br>(0.5) | 8<br>(3.8)   | 202<br>(95.7) | 4.62<br>(.58) | 1 | 0 | 0 | 19<br>(100) | 5 | 1 |
|                        | 5.3 The physician comprehensibly communicates all important information about the diagnosis and treatment | 0          | 2<br>(0.9)   | 209<br>(99.1) | 4.81<br>(.41) | 1 | 0 | 0 | 19<br>(100) | 5 | 1 |
|                        | 5.4 The physician informs the patient about how to handle his or her illness or disease                   | 1<br>(0.5) | 0            | 210<br>(99.5) | 4.83<br>(.41) | 1 | 0 | 0 | 19<br>(100) | 5 | 1 |
|                        | 5.5 The physician motivates the patient to actively take part in the treatment process                    | 4<br>(1.9) | 26<br>(12.3) | 181<br>(85.8) | 4.36<br>(.78) | 1 | 0 | 0 | 19<br>(100) | 5 | 1 |
|                        | 5.6 The patient's concerns are treated confidentially                                                     | 4<br>(1.9) | 14<br>(6.6)  | 194<br>(91.9) | 4.66<br>(.70) | 1 | 0 | 0 | 19<br>(100) | 5 | 1 |
|                        | 5.7 The physician treats the patient empathically                                                         | 2<br>(0.9) | 18<br>(8.5)  | 191<br>(90.5) | 4.5<br>(.69)  | 1 | 0 | 0 | 19<br>(100) | 5 | 1 |
|                        | 5.8 Decisions about the course of action are made together with the patient                               | 4<br>(1.9) | 11<br>(5.2)  | 196<br>(92.9) | 4.63<br>(.67) | 1 | 0 | 0 | 19<br>(100) | 5 | 1 |

|           |                                                                                     |            |             |               |               |   |   |             |              |   |   |
|-----------|-------------------------------------------------------------------------------------|------------|-------------|---------------|---------------|---|---|-------------|--------------|---|---|
| 6 Outcome | 6.1 The state of the patient's health improves, in case this was expected           | 3<br>(1.4) | 14<br>(6.6) | 194<br>(91.9) | 4.55<br>(.72) | 1 | 0 | 1<br>(5.3)  | 18<br>(94.7) | 5 | 1 |
|           | 6.2 The patient is satisfied with the treatment                                     | 3<br>(1.4) | 11<br>(5.2) | 197<br>(93.4) | 4.60<br>(.65) | 1 | 0 | 2<br>(10.5) | 17<br>(89.5) | 4 | 1 |
|           | 6.3 The patient returns to the same physician for check-ups, etc. (patient loyalty) | 3<br>(1.4) | 21<br>(10)  | 187<br>(88.6) | 4.44<br>(.73) | 1 | 0 | 0           | 19<br>(100)  | 4 | 1 |
|           | 6.4 The treatment was efficient (i.e. cost-benefit ratio was accurate)              | 9<br>(4.3) | 21<br>(10)  | 187<br>(88.6) | 4.26<br>(.85) | 1 | 0 | 1<br>(5.3)  | 18<br>(94.7) | 4 | 1 |

<sup>a</sup>Categorization: 1= important; 2= not important
