# Supplementary material for: Physician Rating Websites: What Aspects Are Important to Identify a Good Doctor, and Are Patients Capable of Assessing Them? A Mixed-Methods Approach Including Physicians’ and Health Care Consumers’ Perspectives
Source: PubMed Central journal article supplement (PMC5432667; doi:10.2196/jmir.6875), 2017-05-01
Supplement: jmir_v19i5e127_app2.pdf [file jmir_v19i5e127_app2.pdf]

Appendix 2: Indicator comparison between health care consumers and physicians in terms of health consumers' evaluation capability.

| Dimension        | Indicator                                                                                                                | Health care consumers  |                                  |                    |                |                            | Physicians                |                                  |                    |      |                            |
|------------------|--------------------------------------------------------------------------------------------------------------------------|------------------------|----------------------------------|--------------------|----------------|----------------------------|---------------------------|----------------------------------|--------------------|------|----------------------------|
|                  |                                                                                                                          | Not evaluable<br>n (%) | Neutral or<br>undecided<br>n (%) | Evaluable<br>n (%) | Mean<br>(SD)   | Cate-<br>gory <sup>a</sup> | Not<br>evaluable<br>n (%) | Neutral or<br>undecided<br>n (%) | Evaluable<br>n (%) | Mode | Cate-<br>gory <sup>a</sup> |
| 1 Infrastructure | 1.1 The physician's practice is easily accessible and reachable by public transport and car                              | 8<br>(3.8)             | 13<br>(6.2)                      | 190<br>(90.0)      | 4.60<br>(0.84) | 1                          | 0                         | 0                                | 19<br>(100)        | 5    | 1                          |
|                  | 1.2 The physician has necessary instruments to make the diagnosis in the practice                                        | 20<br>(9.5)            | 62<br>(29.4)                     | 129<br>(61.1)      | 3.75<br>(.93)  | 1                          | 6<br>(31.6)               | 13<br>(68.4)                     | 0                  | 3    | 2                          |
|                  | 1.3 The patient's privacy is guaranteed                                                                                  | 43<br>(20.4)           | 50<br>(23.7)                     | 118<br>(55.9)      | 3.62<br>(1.24) | 2                          | 0                         | 0                                | 19<br>(100)        | 5    | 1                          |
|                  | 1.4 The practice is clean and hygienic                                                                                   | 14<br>(6.6)            | 21<br>(10.0)                     | 176<br>(83.4)      | 4.29<br>(.91)  | 1                          | 0                         | 0                                | 19<br>(100)        | 5    | 1                          |
| 2 Staff          | 2.1 An appropriate number of expert staff is present in the practice (to welcome patients, assist with treatments, etc.) | 13<br>(6.2)            | 46<br>(21.8)                     | 152<br>(72.0)      | 4.00<br>(.91)  | 1                          | 2<br>(10.5)               | 0                                | 19<br>(89.5)       | 4    | 1                          |
|                  | 2.2 The medical practice assistants are helpful and friendly                                                             | 2<br>(0.9)             | 16<br>(7.6)                      | 193<br>(91.5)      | 4.55<br>(.68)  | 1                          | 0                         | 1<br>(5.3)                       | 18<br>(94.7)       | 5    | 1                          |
|                  | 2.3 The medical practice assistants are experienced in their work                                                        | 53<br>(25.1)           | 71<br>(33.6)                     | 87<br>(41.2)       | 3.23<br>(1.04) | 2                          | 15<br>(78.9)              | 4<br>(21.1)                      | 0                  | 1    | 2                          |

|                    |                                                                                                           |               |              |               |                |   |              |              |              |   |   |
|--------------------|-----------------------------------------------------------------------------------------------------------|---------------|--------------|---------------|----------------|---|--------------|--------------|--------------|---|---|
|                    | 2.4 The physician has a lot of work experience and practices already for a longer time                    | 21<br>(10)    | 77<br>(36.5) | 113<br>(53.6) | 3.57<br>(.93)  | 1 | 3<br>(15.3)  | 15<br>(78.9) | 1<br>(5.3)   | 3 | 2 |
|                    | 2.5 The physician collaborates well with his team                                                         | 23<br>(10.9)  | 60<br>(28.4) | 128<br>(60.7) | 3.73<br>(.99)  | 1 | 0            | 0            | 19<br>(100)  | 4 | 1 |
|                    | 2.6 The physician has completed a good education                                                          | 64<br>(30.3)  | 69<br>(32.7) | 78<br>(37.0)  | 3.15<br>(1.16) | 2 | 15<br>(78.9) | 4<br>(21.1)  | 0            | 1 | 2 |
| 3 Organization     | 3.1 The waiting time until the next available appointment is short                                        | 6<br>(2.8)    | 41<br>(19.4) | 164<br>(77.7) | 4.20<br>(.96)  | 1 | 0            | 0            | 19<br>(100)  | 5 | 1 |
|                    | 3.2 The patients are notified in case of appointment delays or cancellations                              | 24<br>(11.4)  | 36<br>(17.1) | 151<br>(71.6) | 3.99<br>(1.10) | 1 | 0            | 0            | 19<br>(100)  | 5 | 1 |
|                    | 3.3 It is easy to schedule an appointment with the physician                                              | 5<br>(2.4)    | 19<br>(9.0)  | 187<br>(88.6) | 4.40<br>(.79)  | 1 | 0            | 0            | 19<br>(100)  | 5 | 1 |
|                    | 3.4 The physician is available for phone consultations (before or after the appointment)                  | 20<br>(9.5)   | 44<br>(20.9) | 147<br>(69.7) | 3.99<br>(1.10) | 1 | 0            | 0            | 19<br>(100)  | 5 | 1 |
| 4 Technical skills | 4.1 The patient is diagnosed correctly                                                                    | 49<br>(23.2)  | 81<br>(38.4) | 81<br>(38.4)  | 3.22<br>(1.06) | 2 | 4<br>(21.1)  | 2<br>(10.6)  | 13<br>(68.4) | 4 | 1 |
|                    | 4.2 The physician asks the relevant questions and orders the correct tests to reach the correct diagnosis | 37<br>(17.55) | 89<br>(42.2) | 85<br>(40.3)  | 3.31<br>(1.01) | 2 | 5<br>(26.6)  | 14<br>(73.7) | 0            | 0 | 2 |
|                    | 4.3 The physician proceeds systematically and competently to reach the correct diagnosis                  | 30<br>(14.2)  | 75<br>(35.5) | 106<br>(50.2) | 3.47<br>(1.00) | 2 | 4<br>(21.1)  | 13<br>(68.4) | 2<br>(10.5)  | 0 | 2 |

|                        |                                                                                                                                         |              |              |               |                |   |              |              |              |   |   |
|------------------------|-----------------------------------------------------------------------------------------------------------------------------------------|--------------|--------------|---------------|----------------|---|--------------|--------------|--------------|---|---|
|                        | 4.4 The physician presents an appropriate and complete number of treatment options to the patient                                       | 37<br>(17.5) | 57<br>(27.0) | 117<br>(55.5) | 3.52<br>(1.07) | 2 | 3<br>(15.8)  | 15<br>(78.9) | 1<br>(5.3)   | 0 | 2 |
|                        | 4.5 The physician assesses the patient's handicaps correctly and presents him or her with appropriate information and treatment options | 30<br>(14.2) | 63<br>(29.9) | 118<br>(55.9) | 3.55<br>(.98)  | 1 | 0            | 1<br>(5.3)   | 18<br>(94.7) | 4 | 1 |
|                        | 4.6 The physician and his team execute the treatment steps correctly                                                                    | 41<br>(19.4) | 81<br>(38.4) | 89<br>(42.2)  | 3.34<br>(1.01) | 2 | 3<br>(15.8)  | 15<br>(78.9) | 1<br>(5.3)   | 0 | 2 |
|                        | 4.7 The physician and his team adhere to hygiene guidelines                                                                             | 34<br>(16.1) | 51<br>(24.2) | 126<br>(59.7) | 3.71<br>(1.13) | 1 | 14<br>(73.9) | 5<br>(26.6)  | 0            | 2 | 2 |
|                        | 4.8 The physician executes the treatment competently                                                                                    | 27<br>(12.8) | 73<br>(34.6) | 111<br>(52.6) | 3.59<br>(1.00) | 2 | 4<br>(21.1)  | 13<br>(68.4) | 2<br>(10.5)  | 0 | 2 |
|                        | 4.9 The physician makes the correct diagnosis timely and initiates the treatment swiftly                                                | 42<br>(19.9) | 67<br>(31.8) | 102<br>(48.3) | 3.40<br>(1.06) | 2 | 0            | 2<br>(10.5)  | 17<br>(89.5) | 4 | 1 |
| 5 Interpersonal skills | 5.1 The patient can freely express his symptoms (comfortable conversation climate)                                                      | 4<br>(1.9)   | 21<br>(10)   | 186<br>(88.2) | 4.51<br>(.77)  | 1 | 0            | 0            | 19<br>(100)  | 5 | 1 |
|                        | 5.2 The physician involves the patient adequately into the treatment decision                                                           | 6<br>(2.8)   | 39<br>(18.5) | 166<br>(78.7) | 4.18<br>(.85)  | 1 | 0            | 0            | 19<br>(100)  | 5 | 1 |
|                        | 5.3 The physician comprehensibly communicates all important information about the diagnosis and treatment                               | 8<br>(3.8)   | 35<br>(16.6) | 168<br>(79.6) | 4.21<br>(.87)  | 1 | 0            | 0            | 19<br>(100)  | 5 | 1 |

|           |                                                                                         |              |              |               |                |   |             |              |              |   |   |
|-----------|-----------------------------------------------------------------------------------------|--------------|--------------|---------------|----------------|---|-------------|--------------|--------------|---|---|
|           | 5.4 The physician informs the patient about how to handle his or her illness or disease | 18<br>(8.5)  | 46<br>(21.8) | 147<br>(69.7) | 3.92<br>(.98)  | 1 | 2<br>(10.5) | 1<br>(5.3)   | 16<br>(84.2) | 1 | 1 |
|           | 5.5 The physician motivates the patient to actively take part in the treatment process  | 9<br>(4.3)   | 36<br>(17.1) | 166<br>(78.7) | 4.19<br>(.87)  | 1 | 1<br>(5.3)  | 1<br>(5.3)   | 17<br>(89.5) | 4 | 1 |
|           | 5.6 The patient's concerns are treated confidentially                                   | 78<br>(37)   | 62<br>(29.4) | 71<br>(33.6)  | 3.00<br>(1.35) | 1 | 1<br>(5.3)  | 1<br>(5.3)   | 17<br>(89.5) | 5 | 1 |
|           | 5.7 The physician treats the patient empathically                                       | 6<br>(2.8)   | 28<br>(13.3) | 177<br>(83.9) | 4.38<br>(.82)  | 2 | 0           | 0            | 19<br>(100)  | 5 | 1 |
|           | 5.8 Decisions about the course of action are made together with the patient             | 11<br>(5.2)  | 23<br>(10.9) | 177<br>(83.9) | 4.30<br>(.90)  | 1 | 0           | 3<br>(15.8)  | 16<br>(84.2) | 4 | 1 |
| 6 Outcome | 6.1 The state of the patient's health improves, in case this was expected               | 26<br>(12.3) | 44<br>(20.9) | 141<br>(66.8) | 3.80<br>(1.06) | 1 | 0           | 0            | 19<br>(100)  | 1 | 1 |
|           | 6.2 The patient is satisfied with the treatment                                         | 9<br>(4.3)   | 28<br>(13.3) | 174<br>(82.5) | 4.32<br>(.88)  | 1 | 0           | 1<br>(5.3)   | 18<br>(94.7) | 5 | 1 |
|           | 6.3 The patient returns to the same physician for check-ups, etc. (patient loyalty)     | 22<br>(10.4) | 27<br>(12.8) | 162<br>(76.8) | 4.10<br>(1.10) | 2 | 0           | 0            | 19<br>(100)  | 5 | 1 |
|           | 6.4 The treatment was efficient (i.e. cost-benefit ratio was accurate)                  | 60<br>(28.4) | 67<br>(31.8) | 84<br>(39.8)  | 3.18<br>(1.06) | 1 | 0           | 16<br>(84.2) | 3<br>(15.8)  | 0 | 2 |

<sup>a</sup>Categorization: 1= evaluable; 2= not evaluable
